# Supplementary material
Source: publisher site journal article supplement (https://www.spandidos-publications.com/3652/downloadSupplementary)
Supplement: Supplementary file 1 [file downloadSupplementary]

## Sheet: Sheet1
Table SV. Raw data of serum ITIH4 determined by ELISA.
No.	Well No.	Sample No.	Absorbance	Calibrated OD Value	Quantitative Value (Dilution ratio 1:5)	Final Concentration, pg/ml	Item Name
1	A2	1-1	1.08778	0.965677	961.805	4809.02	ITIH4
2	A3	2-1	1.39169	1.26958	1438.3	7191.5	ITIH4
3	A4	3-1	1.15612	1.03402	1055.03	5275.15	ITIH4
4	A5	4-1	1.26968	1.14758	1226.98	6134.9	ITIH4
5	A6	5-1	0.833342	0.711242	670.418	3352.09	ITIH4
6	A7	6-1	0.878533	0.756433	716.636	3583.18	ITIH4
7	A8	7-1	1.09764	0.975536	974.812	4874.06	ITIH4
8	A9	8-1	0.884848	0.762748	723.263	3616.32	ITIH4
9	A10	9-1	0.982391	0.860291	831.372	4156.86	ITIH4
10	A11	10-1	1.05322	0.931123	917.341	4586.7	ITIH4
11	A12	11-1	0.732681	0.610581	574.32	2871.6	ITIH4
12	B2	12-1	1.15488	1.03278	1053.28	5266.4	ITIH4
13	B3	13-1	0.940865	0.818765	783.98	3919.9	ITIH4
14	B4	14-1	0.885325	0.763225	723.765	3618.82	ITIH4
15	B5	15-1	1.27363	1.15153	1233.36	6166.8	ITIH4
16	B6	16-1	1.28533	1.16323	1252.47	6262.35	ITIH4
17	B7	17-1	1.00959	0.887487	863.588	4317.94	ITIH4
18	B8	1-1	1.02197	0.899867	878.574	4392.87	ITIH4
19	B9	2-1	1.3287	1.2066	1325.55	6627.76	ITIH4
20	B10	3-1	1.26744	1.14534	1223.36	6116.8	ITIH4
21	B11	4-1	1.35054	1.22844	1363.74	6818.7	ITIH4
22	B12	5-1	0.794367	0.672267	632.155	3160.77	ITIH4
23	C2	6-1	0.981772	0.859672	830.65	4153.25	ITIH4
24	C3	7-1	1.1083	0.986198	989.042	4945.21	ITIH4
25	C4	8-1	0.904472	0.782372	744.132	3720.66	ITIH4
26	C5	9-1	1.07808	0.955982	949.154	4745.77	ITIH4
27	C6	10-1	1.04284	0.920736	904.308	4521.54	ITIH4
28	C7	11-1	0.80597	0.68387	643.399	3216.99	ITIH4
29	C8	12-1	1.15987	1.03777	1060.36	5301.8	ITIH4
30	C9	13-1	0.960832	0.838732	806.503	4032.52	ITIH4
31	C10	14-1	0.904037	0.781937	743.665	3718.32	ITIH4
32	C11	15-1	1.37949	1.25739	1415.84	7079.2	ITIH4
33	C12	16-1	1.28749	1.16539	1256.02	6280.1	ITIH4
34	D2	17-1	1.04224	0.920138	903.562	4517.81	ITIH4
35	D3	1-2	1.27163	1.14953	1230.13	6150.65	ITIH4
36	D4	2-2	1.57187	1.44977	1808.38	9041.89	ITIH4
37	D5	3-2	1.33806	1.21596	1341.79	6708.95	ITIH4
38	D6	4-2	1.35269	1.23059	1367.55	6837.74	ITIH4
39	D7	5-2	1.36496	1.24286	1389.48	6947.39	ITIH4
40	D8	6-2	1.12885	1.00675	1016.96	5084.8	ITIH4
41	D9	7-2	1.13342	1.01132	1023.26	5116.3	ITIH4
42	D10	8-2	1.08794	0.965841	962.02	4810.1	ITIH4
43	D11	9-2	1.32826	1.20616	1324.78	6623.9	ITIH4
44	D12	10-2	1.25233	1.13023	1199.23	5996.15	ITIH4
45	E2	11-2	1.13422	1.01212	1024.37	5121.85	ITIH4
46	E3	12-2	1.55612	1.43402	1773.02	8865.1	ITIH4
47	E4	13-2	1.05446	0.932356	918.898	4594.49	ITIH4
48	E5	14-2	1.16253	1.04043	1064.15	5320.76	ITIH4
49	E6	15-2	1.40609	1.28399	1465.23	7326.15	ITIH4
50	E7	16-2	1.35358	1.23148	1369.13	6845.65	ITIH4
51	E8	17-2	1.18793	1.06583	1100.97	5504.86	ITIH4
52	E9	1-2	1.31761	1.19551	1306.52	6532.6	ITIH4
53	E10	2-2	1.52501	1.40291	1704.94	8524.7	ITIH4
54	E11	3-2	1.36656	1.24446	1392.35	6961.75	ITIH4
55	E12	4-2	1.40744	1.28534	1467.78	7338.9	ITIH4
56	F2	5-2	1.12631	1.00421	1013.48	5067.4	ITIH4
57	F3	6-2	1.11451	0.992406	997.408	4987.04	ITIH4
58	F4	7-2	1.13809	1.01599	1029.73	5148.65	ITIH4
59	F5	8-2	0.834614	0.712514	671.691	3358.45	ITIH4
60	F6	9-2	1.37236	1.25026	1402.85	7014.23	ITIH4
61	F7	10-2	1.46176	1.33966	1573.52	7867.6	ITIH4
62	F8	11-2	1.0516	0.929497	915.291	4576.45	ITIH4
63	F9	12-2	1.361	1.2389	1382.36	6911.8	ITIH4
64	F10	13-2	0.750505	0.628405	590.71	2953.55	ITIH4
65	F11	14-2	1.49881	1.37671	1649.4	8246.98	ITIH4
66	F12	15-2	1.54426	1.42216	1746.79	8733.96	ITIH4
67	G2	16-2	1.34375	1.22165	1351.76	6758.8	ITIH4
68	G3	17-2	1.14533	1.02323	1039.84	5199.18	ITIH4
69	G4	S7	2.3066	2.1845	N/A	N/A	ITIH4
70	G5	S6	1.8342	1.7121	N/A	N/A	ITIH4
71	G6	S5	1.0224	0.9003	N/A	N/A	ITIH4
72	G7	S4	0.9432	0.8211	N/A	N/A	ITIH4
73	G8	S3	0.5238	0.4017	N/A	N/A	ITIH4
74	G9	S2	0.3244	0.2023	N/A	N/A	ITIH4
75	G10	S1	0.1846	0.0625	N/A	N/A	ITIH4
76	G11	S0	0.1225	0.0004	N/A	N/A	ITIH4
77	G12	S7	2.4235	2.3014	N/A	N/A	ITIH4
78	H2	S6	1.7696	1.6475	N/A	N/A	ITIH4
79	H3	S5	1.0648	0.9427	N/A	N/A	ITIH4
80	H4	S4	0.9216	0.7995	N/A	N/A	ITIH4
81	H5	S3	0.5352	0.4131	N/A	N/A	ITIH4
82	H6	S2	0.3546	0.2325	N/A	N/A	ITIH4
83	H7	S1	0.1773	0.0552	N/A	N/A	ITIH4
84	H8	S0	0.1217	-0.0004	N/A	N/A	ITIH4
ITIH4, inter α-trypsin inhibitor heavy chain H4; N/A, not applicable.
